# Supplementary material
Source: publisher figshare collection journal article supplement (https://frontiersin.figshare.com/ndownloader/files/25356632)
Supplement: Supplementary file 1 [file 25356632]

Supplementary data for ‘Population genetic structure and gene expression plasticity of the deep-sea vent and seep squat lobster *Shinkaia crosnieri’*

#####################

# commands used in this study

#####################

# filter raw reads with Trimmomatic

java -jar trimmomatic-0.36.jar PE rawdata_1.fq.gz rawdata_2.fq.gz data_1p.fq data_1up.fq data_2p.fq data_2up.fq ILLUMINACLIP:TruSeq3-PE.fa:2:30:10 LEADING:10 TRAILING:10 SLIDINGWINDOW:4:15 MINLEN:25

# assemble reads with Trinity v.2.8.3

Trinity --seqType fq --max_memory 100G --left data_1p.fq --right data_2p.fq --min_contig_length 300 --min_kmer_cov 2

# choose the longest isoform of each gene with a custom Python script

# -*- coding: UTF-8 -*-

f1 = open(r'./Trinity.fasta','r')

f2 = open(r'./list.txt','r+')

f3 = open(r'./temp_list.txt','r+')

f4 = open(r'./list_clean.txt','r+')

th = {}

lines = f1.readlines()

for line in lines:

if '>' in line:

a = str(line.split()[0:2])

f2.write(a + '\n')

lines = f2.readlines()

for line in lines[1:]:

b = line.split("'")[1]

c = line.split("'")[3]

th[b]=c

a = []

nu = []

c = []

th1 = sorted(th.iteritems(), key=lambda d:d[0])

for i in range(0, len(th1)):

b = str(th1[i])

a.append(b.split('i')[0])

tmp = b.split("'")[3]

nu.append(tmp.split('=')[1])

for i in a:

c = []

if a.count(i)>1:

m = a.index(i)

p = a.count(i)

for i in range(m,m+p):

c.append(int(nu[i]))

c.sort()

mark = nu.index(str(c[-1]))

s = str(th1[mark]).split("'")[1]

f3.write(s+'\n')

else:

n = a.index(i)

s = str(th1[n]).split("'")[1]

f3.write(s+'\n')

th = []

for line in open(r'./temp_list.txt','r+'):

th.append(line)

l = []

[l.append(i) for i in th if not i in l]

F4 = open(r'./list_clean.txt','r+')

for i in l:

f4.write(i)

f1.close()

f2.close()

f3.close()

f4.close()

# -*- coding: utf-8 -*-

#define the document names

cleanQuant = "list_clean.txt"

orginalData = "Trinity.fasta"

outputfilename = "return_cleanreads.fasta"

#Read all sequence names from clean_quant

def get_clean_quant():

result = []

with open(cleanQuant) as fp:

while True:

line = fp.readline().strip()

if not line:

break

result.append(line)

#print(result[-1])

return result

#output new ducuments

def output_file(total_result):

with open(orginalData) as fp:

ofp = open(outputfilename,'w')

saveState = False #check one data is analyzing

startSave = False #if the name in the clean data then start save

while True:

line = fp.readline()

if not line:

break

if line.startswith('>'):

#check the name if in the clean data

name = line.split(" ")[0]

if name in total_result:

ofp.write(line)

startSave = True

else:

startSave = False

else:

if startSave:

ofp.write(line)

ofp.close()

if __name__=="__main__":

total_result = get_clean_quant()

output_file(total_result)

print("Done!!!")

# remove redundant unigenes with cd-hit-est

cd-hit-est -i return_cleanreads.fasta -o return_cleanreads_cdhit95.fasta -c 0.95 -M 300000

# predict candidate ORF with Transdecoder

TransDecoder.LongOrfs -t target_transcripts.fasta

TransDecoder.Predict -t target_transcripts.fasta -- single_best_only

# check the transcriptome completeness with BUSCO

python run_BUSCO.py -i cds.fasta -l /home/share/busco-master/db/metazoa_odb9 -o trinity_busco -m tran

# evaluate with Perl script

assemblathon_stats.pl cds.fasta

# annotation

blastp -num_threads 96 -query cds.fasta.transdecoder.pep -db nr_database -out Blastp.m5 -outfmt 5 -evalue 1e-5 -word_size 3 -num_alignments 20 -max_hsps 20

blastx -query cds.fasta -db uniprot_sprot.fasta -outfmt 5 -out cds_swissport.xml -evalue 1e-5

# quantify abundances of the assembled unigenes with Kallisto

kallisto index cds.fasta -I reference -k 31

kallisto quant -i reference -o ./output data_1p.fq data_2p.fq. –b 100

# normalize with edgeR

trinityrnaseq-Trinity-v2.8.3/util/abundance_estimates_to_matrix.pl --est_method kallisto --gene_trans_map none --cross_sample_norm none scs1_abundance.tsv scs2_abundance.tsv scs3_abundance.tsv scs4_abundance.tsv scs5_abundance.tsv scs6_abundance.tsv scs7_abundance.tsv scs8_abundance.tsv scs9_abundance.tsv scs10_abundance.tsv scs11_abundance.tsv scs12_abundance.tsv scs13_abundance.tsv scs14_abundance.tsv scs15_abundance.tsv scs16_abundance.tsv scs17_abundance.tsv scs18_abundance.tsv scs19_abundance.tsv scs20_abundance.tsv ot1_abundance.tsv ot2_abundance.tsv ot3_abundance.tsv ot4_abundance.tsv ot5_abundance.tsv ot6_abundance.tsv ot7_abundance.tsv ot8_abundance.tsv ot9_abundance.tsv ot10_abundance.tsv ot11_abundance.tsv ot12_abundance.tsv ot13_abundance.tsv ot14_abundance.tsv ot15_abundance.tsv ot16_abundance.tsv ot17_abundance.tsv ot18_abundance.tsv ot19_abundance.tsv ot20_abundance.tsv ot21_abundance.tsv ot22_abundance.tsv ot23_abundance.tsv ot24_abundance.tsv

trinityrnaseq-Trinity-v2.8.3/util/run_DE_analysis.pl --matrix kallisto.isoform.counts.matrix --method edgeR --samples_file sample_file.txt

# detect orthologous with proteinortho6

perl proteinortho6.pl -project=sl_tran -p=blastn+ -cpus=2 -graph -clean scs1.Trinity.fasta scs2.Trinity.fasta scs3.Trinity.fasta scs4.Trinity.fasta scs5.Trinity.fasta scs6.Trinity.fasta scs7.Trinity.fasta scs8.Trinity.fasta scs9.Trinity.fasta scs10.Trinity.fasta scs11.Trinity.fasta scs12.Trinity.fasta scs13.Trinity.fasta scs14.Trinity.fasta scs15.Trinity.fasta scs16.Trinity.fasta scs17.Trinity.fasta scs18.Trinity.fasta scs19.Trinity.fasta scs20.Trinity.fasta ot1.Trinity.fasta ot2.Trinity.fasta ot3.Trinity.fasta ot4.Trinity.fasta ot5.Trinity.fasta ot6.Trinity.fasta ot7.Trinity.fasta ot8.Trinity.fasta ot9.Trinity.fasta ot10.Trinity.fasta ot11.Trinity.fasta ot12.Trinity.fasta ot13.Trinity.fasta ot14.Trinity.fasta ot15.Trinity.fasta ot16.Trinity.fasta ot17.Trinity.fasta ot18.Trinity.fasta ot19.Trinity.fasta ot20.Trinity.fasta ot21.Trinity.fasta ot22.Trinity.fasta ot23.Trinity.fasta ot24.Trinity.fasta

# call SNP

java -jar trimmomatic-0.36.jar PE scs5_1.fq.gz scs5_2.fq.gz scs5_1p.fq scs5_1up.fq scs5_2p.fq scs5_2up.fq ILLUMINACLIP:TruSeq3-PE-2.fa:2:30:10 LEADING:10 TRAILING:10 SLIDINGWINDOW:4:15 MINLEN:2

bowtie2 -D 20 -R 2 -N 1 -L 18 -i S,1,0.50 --maxins 1200 -x cds_list -1 scs5_1p.fq -2 scs5_2p.fq 1>scs5_map.sam 2>scs5_mapping.err

samtools view -bS scs5_map.sam >scs5_map.bam

samtools sort scs5_map.bam -m 5G >scs5_map.sorted.bam

java -jar picard.jar MarkDuplicates I=scs5_map.sorted.bam O=scs5_picard.sorted.bam M=metrics.txt MAX_FILE_HANDLES=4000

samtools mpileup -q 10 -Q 20 -g -u -I -f cds_list.fasta scs5_picard.sorted.bam| bcftools call -mv -Ov >./scs5.vcf

bgzip -c scs5.vcf > scs5.vcf.gz

bcftools index scs5.vcf.gz

bcftools merge ot24.vcf.gz ot23.vcf.gz ot22.vcf.gz ot21.vcf.gz ot20.vcf.gz ot19.vcf.gz ot18.vcf.gz ot17.vcf.gz ot16.vcf.gz ot15.vcf.gz ot14.vcf.gz ot13.vcf.gz ot12.vcf.gz ot11.vcf.gz ot10.vcf.gz ot9.vcf.gz ot8.vcf.gz ot7.vcf.gz ot6.vcf.gz ot5.vcf.gz ot4.vcf.gz ot3.vcf.gz ot2.vcf.gz ot1.vcf.gz scs1.vcf.gz scs2.vcf.gz scs3.vcf.gz scs4.vcf.gz scs5.vcf.gz scs6.vcf.gz scs7.vcf.gz scs8.vcf.gz scs9.vcf.gz scs10.vcf.gz scs11.vcf.gz scs12.vcf.gz scs13.vcf.gz scs14.vcf.gz scs15.vcf.gz scs16.vcf.gz scs17.vcf.gz scs18.vcf.gz scs19.vcf.gz scs20.vcf.gz --force-samples > all.vcf

# filter SNP with VCFtool

vcftools --vcf all.vcf --recode --out out.vcf --min-alleles 2 --max-alleles 2 --maf 0.02 --remove-indels --hwe 0.01 –max-missing 0.05 --minDP 3 --maxDP 120

# detect outlier SNP with the R package pcadapt

> library(pcadapt)

> library(qvalue)

> filename <- read.pcadapt("out.vcf", type = "vcf")

> x <- pcadapt(input = filename, K = 20)

> qval <- qvalue(x$pvalues)$qvalues

> alpha <- 0.1

> outliers <- which(qval < alpha)

# population genetics analysis

plink --vcf file.vcf –recode --out file --double-id --allow-extra-chr

admixture --cv out_plink.bed 2 | tee log2.out

admixture out_plink.bed 2 -j20

> library(gdsfmt)

> library(SNPRelate)

> vcf.fn <-"out.vcf"

> snpgdsVCF2GDS(vcf.fn, "out.gds", method ="biallelic.only")

> genofile <- snpgdsOpen(snpgdsExampleFileName())

> RV <- snpgdsPCA(genofile, num.thread=5, autosome.only=FALSE)

> pc.percent <- RV$varprop*100

> sample.id <- read.gdsn(index.gdsn(genofile, "sample.id"))

> pop_code <- scan("pop_code.txt", what=character())

> tab <- data.frame(sample.id = RV$sample.id, pop=factor(pop_code)[match(RV$sample.id, sample.id)], EV1=RV$eigenvect[,1],EV2=RV$eigenvect[,2], stringsAsFactors = FALSE)

> plot(tab$EV2, tab$EV1, col=as.integer(tab$pop), xlab="eigenvector 1", ylab="eigenvector 2")

> library(diveRsity)

> data(Test_data)

> div_res <- divMigrate(infile = data, boots = 1000, stat = "d_jost")
